# Supplementary material
Source: PubMed Central journal article supplement (PMC5927972)
Supplement: 2018_191098-Disclosures_and_Contributions.pdf [file 2018_191098-Disclosures_and_Contributions.pdf]

Haematologica  
HAEMATOL/2018/191098  
Version 1

AGE-RELATED CLONAL HEMATOPOIESIS AND MONOCLONAL  
B-CELL LYMPHOCYTOSIS/CHRONIC LYMPHOCYTIC LEUKEMIA: A  
NEW ASSOCIATION?

Adalgisa Condoluci and Davide Rossi

Disclosures: The authors have no conflict of interest to disclose

Contributions: DR and AC wrote the manuscript
